# Supplementary material for: Ecological Momentary Assessment and Intervention in the Treatment of Psychotic Disorders: A Systematic Review
Source: Atypon-hosted journal article supplement (doi:10.1176/appi.ps.201600523), 2017-07-03
Supplement: appi.ps.201600523.ds001.pdf [file appi.ps.201600523.ds001.pdf]

**Supplementary 1: Database Search Syntax**

Search limited from 1980 date of search

Cochrane Library

| <b>ID</b> | <b>Search Hit</b>                                                                                                                                                                                                                             |
|-----------|-----------------------------------------------------------------------------------------------------------------------------------------------------------------------------------------------------------------------------------------------|
| #1        | "mobile phone" or "text messaging" or "sms" or "cell phone" or "ecological momentary assessment" or "ecological momentary intervention" or "momentary assessment" or "real time" or "daily life" or "sampling method*" or "experience sampl*" |
| #2        | MeSH descriptor: [Telemedicine] explode all trees                                                                                                                                                                                             |
| #3        | MeSH descriptor: [Cell Phones] explode all trees                                                                                                                                                                                              |
| #4        | MeSH descriptor: [Mobile Applications] explode all trees                                                                                                                                                                                      |
| #5        | MeSH descriptor: [Computers, Handheld] explode all trees                                                                                                                                                                                      |
| #6        | #1 or #2 or #3 or #4 or #5                                                                                                                                                                                                                    |
| #7        | MeSH descriptor: [Mental Disorders] explode all trees                                                                                                                                                                                         |
| #8        | "schizo*" or "psychosis" or "psychotic"                                                                                                                                                                                                       |
| #9        | #7 and #8                                                                                                                                                                                                                                     |
| #10       | #6 and #9                                                                                                                                                                                                                                     |

Pubmed

((cell phone[MeSH Terms]) OR ("mobile phone"[Title/Abstract]) OR ("Text messaging"[Title/Abstract]) OR ("SMS"[Title/Abstract]) OR ("cell phone"[Title/Abstract]) OR "ecological momentary assessment"[Title/Abstract]) OR ("ecological momentary intervention"[Title/Abstract]) OR ("momentary assessment"[Title/Abstract]) OR ("real time"[Title/Abstract]) OR ("daily life"[Title/Abstract]) OR (sampling method\*[Title/Abstract]) OR (experience sampl\*[Title/Abstract])) AND ((psychiatry and psychology category[MeSH Terms]) AND (schizo\*[Title/Abstract]) OR (psychosis [Title/Abstract]) OR (psychotic [Title/Abstract]))

PsychINFO/ARTICLES

(it=({Cellular Phones} OR {Computer Applications} OR {Computer Assisted Diagnosis} OR {Computer Assisted Therapy} OR {Mobile Devices}) OR kw=("mobile phone" or "text messaging" or "sms" or "cell phone" or "ecological momentary assessment" or "ecological momentary intervention" or "momentary assessment" or "real time" or "daily life" or sampling method\* or "experience sampling") OR ab=("mobile phone" or "text messaging" or "sms" or "cell phone" or "ecological momentary assessment" or "ecological momentary intervention" or "momentary assessment" or "real time" or "daily life" or sampling method\* or "experience sampling") OR ti=("mobile phone" or "text messaging" or "sms" or "cell phone" or "ecological momentary assessment" or "ecological momentary intervention" or "momentary assessment" or "real time" or "daily life" or sampling method\* or "experience sampling")) AND (kw=(schizo\* OR psychotic OR psychosis))

OR ab=(schizo\* OR psychotic OR psychosis) OR ti=(schizo\* OR psychotic OR psychosis))
